# The American Journal of Psychiatry

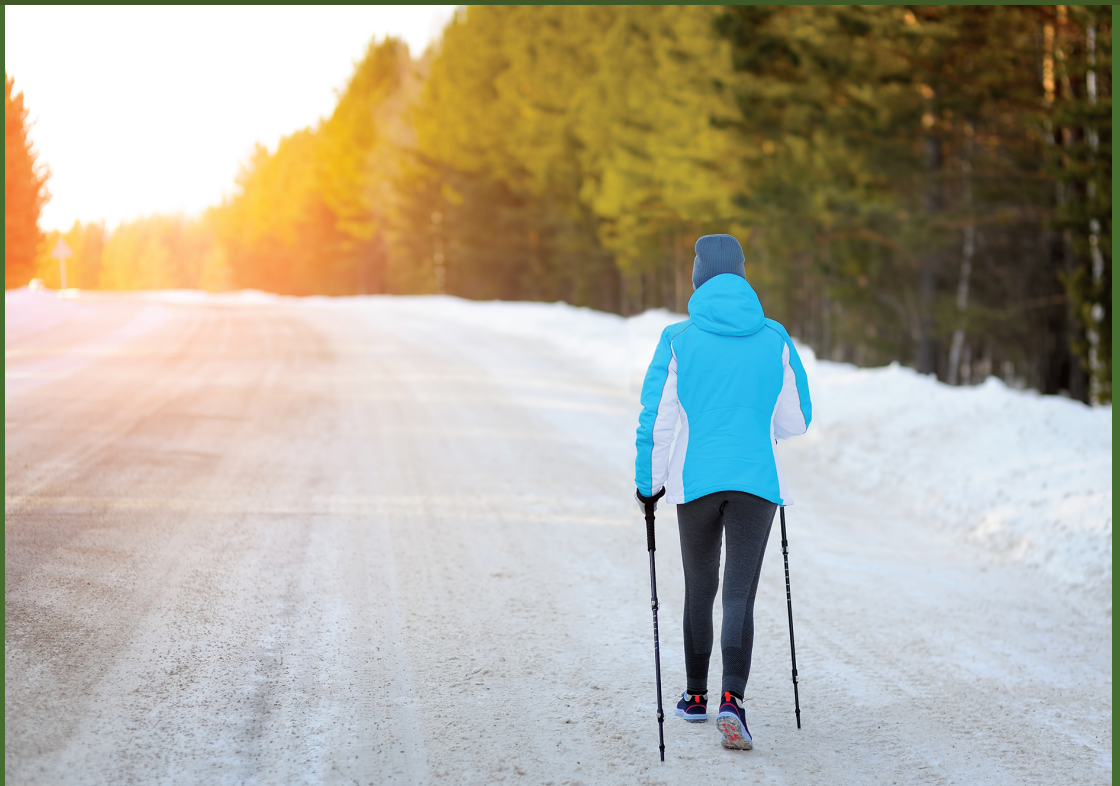

Exercise and the Prevention of Depression:  
Results of the HUNT Cohort Study

Psychiatric Genomics: An Update and an Agenda

Dissociation in Psychiatric Disorders: A Meta-Analysis  
of Studies Using the Dissociative Experiences Scale

Cannabis Use and Risk of Prescription Opioid Use  
Disorder in the United States

AMERICAN  
PSYCHIATRIC  
ASSOCIATION

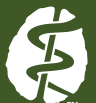

[ajp.psychiatryonline.org](http://ajp.psychiatryonline.org)
